# Supplementary material
Source: Springer Nature journal article supplement (https://www.springerprofessional.de/resource/supplementary/13174_2012_3_MOESM1_ESM.pdf/10784746)

Label:

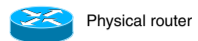

Physical router

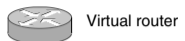

Virtual router

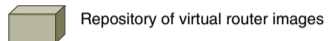

Repository of virtual router images

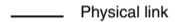

Physical link

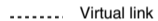

Virtual link

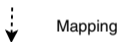

Mapping

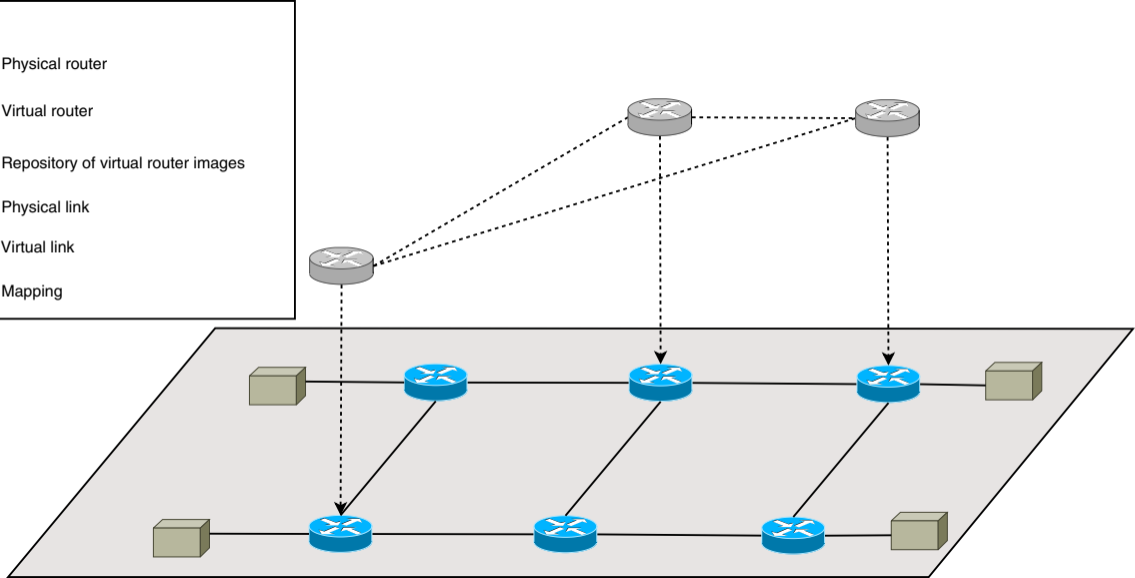

Supplement: MOESM1 [file 10784746]
